# Supplementary material for: Evidence of Synaptic and Neurochemical Remodeling in the Retina of Aging Degus
Source: PubMed Central journal article supplement (PMC7095275; doi:10.3389/fnins.2020.00161), 2020-03-18

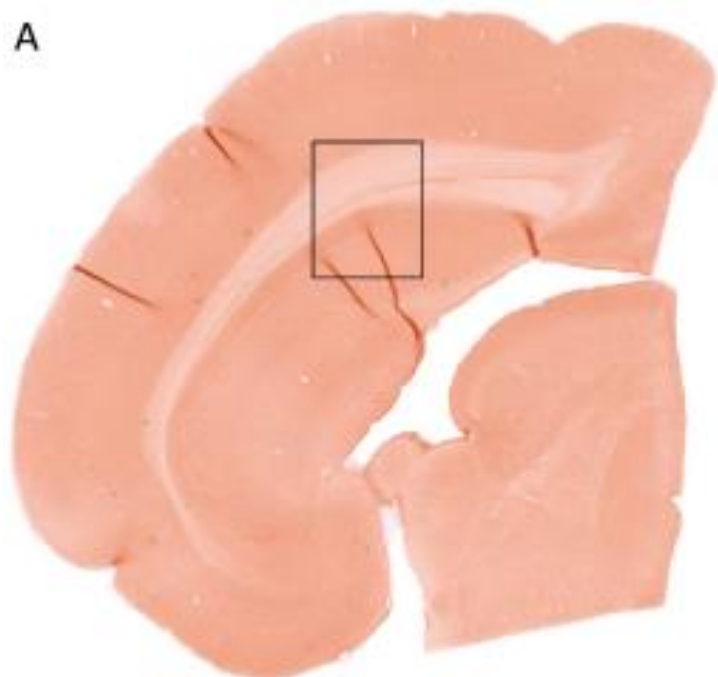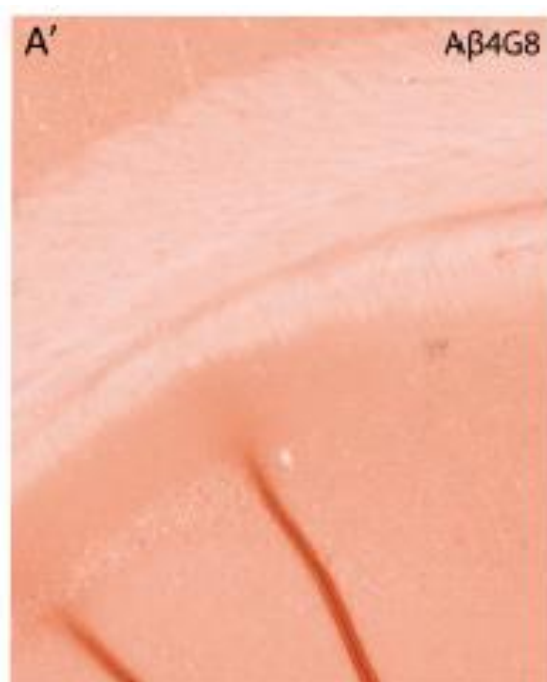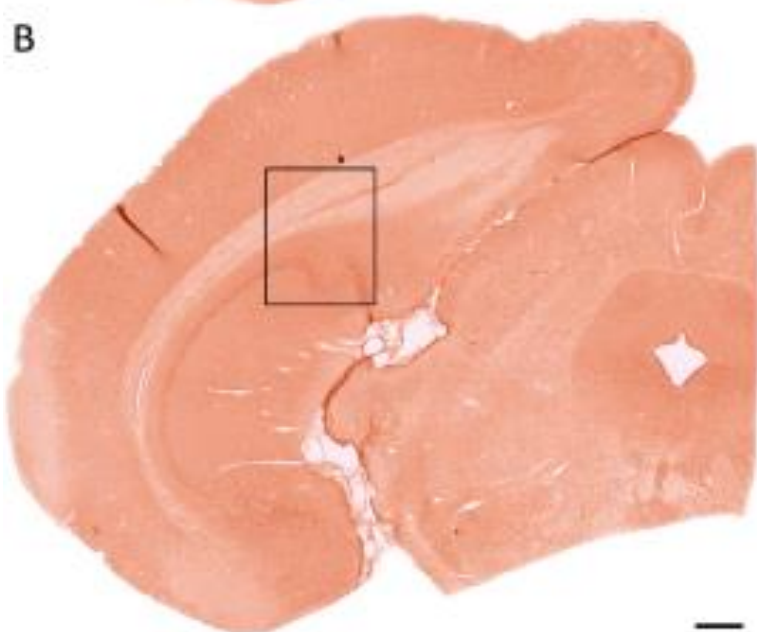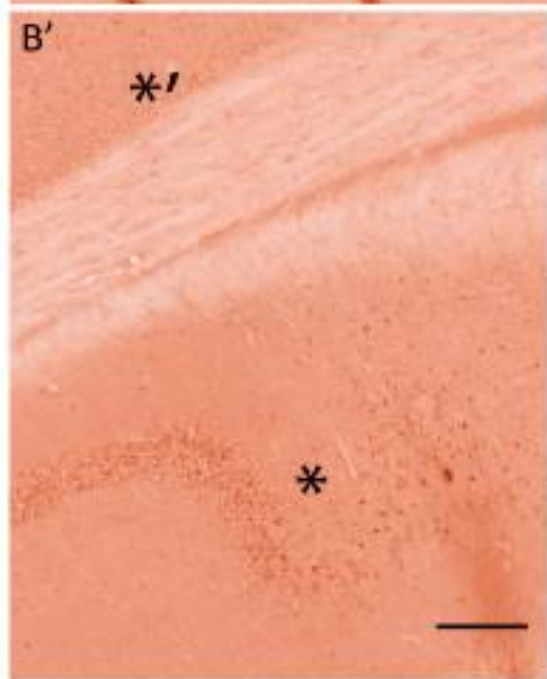

Supplement: Image_1.pdf [file Image_1.pdf]
