# Supplementary material for: Evidence of Synaptic and Neurochemical Remodeling in the Retina of Aging Degus
Source: PubMed Central journal article supplement (PMC7095275; doi:10.3389/fnins.2020.00161), 2020-03-18
Supplement: Table_1.pdf [file Table_1.pdf]

Supplementary table 1. Qualitative comparison of the neurochemical labeling.

|           |            | GC  | IPL | AC | MC | BC  | HC | OPL | ONL |
|-----------|------------|-----|-----|----|----|-----|----|-----|-----|
| Glutamate | Juveniles  | +   | +   | +  | -  | +   | +  | +   | +   |
|           | Young      | +   | ++  | ++ | +  | +++ | ++ | ++  | ++  |
|           | Adults     | +   | ++  | +  | -  | +   | +  | +   | +   |
|           | Old Adults | +++ | +   | +  | -  | ++  | +  | +   | +   |
| Glutamine | Juveniles  | +   | +   | +  | +  | +   | +  | +   | +   |
|           | Young      | -   | +   | +  | +  | ++  | ++ | +   | +   |
|           | Adults     | -   | +   | +  | +  | +   | ++ | +   | +   |
|           | Old Adults | ++  | ++  | ++ | +  | ++  | ++ | ++  | ++  |
| GABA      | Juveniles  | +   | +   | +  | -  | -   | -  | -   | -   |
|           | Young      | +   | +   | +  | -  | -   | +  | +   | -   |
|           | Adults     | ++  | ++  | ++ | +  | +   | -  | -   | -   |
|           | Old Adults | ++  | +   | ++ | +  | +   | +  | +   | +   |

Relative labelling of the neurochemicals compared to the juvenile age: presence (+), not present (-) twice or more the value (++). Abbreviations: GC, ganglion cells; IPL, inner plexiform layer; AC, amacrine cell, MC, Muller cell; BC, bipolar cell; HC, horizontal cell; OPL, outer plexiform layer; ONL, outer nuclear layer
